# Supplementary material
Source: Springer Nature journal article supplement (https://www.springermedizin.de/resource/supplementary/12970_2011_284_MOESM1_ESM.pdf/9594772)
Supplement: MOESM1 [file 9594772]

120 minutes submaximal cycling at 50% of  $W_{max}$

5-min all-out test

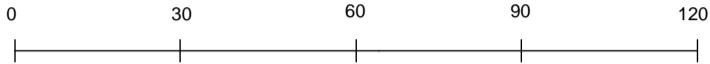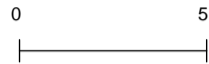

HR Measured every two minutes throughout submaximal cycling

Continuously

RPE ↑ ↑ ↑ ↑ ↑ ↑ ↑ ↑ ↑

Beverage ing. (180ml) ↑ ↑ ↑ ↑ ↑ ↑ ↑ ↑ ↑

Glu, [La<sup>-</sup>], VO<sub>2</sub>, RER ↑ ↑ ↑ ↑ ↑

BUN ↑ ↑

Power output Measured continuously throughout submaximal cycling

Continuously
